1 **Title**

2 Highly-efficient Cpf1-mediated gene targeting in mice following high concentration  
3 pronuclear injection

4  
5 **Authors**

6 Dawn E. Watkins-Chow<sup>\* ††</sup>, Gaurav K. Varshney<sup># ††</sup>, Lisa J. Garrett<sup>‡</sup>, Zelin Chen<sup>†</sup>, Erin  
7 A. Jimenez<sup>†</sup>, Cecilia Rivas<sup>‡</sup>, Kevin S. Bishop<sup>§</sup>, Raman Sood<sup>§</sup>, Ursula L. Harper<sup>\*\*</sup>,  
8 William J. Pavan<sup>\* ††</sup>, and Shawn M. Burgess<sup>† ††</sup>

9  
10 <sup>\*</sup>Genetic Disease Research Branch, National Human Genome Research Institute,  
11 National Institutes of Health, Bethesda, Maryland 20892

12  
13 <sup>#</sup>Functional and Chemical Genomics Program, Oklahoma Medical Research  
14 Foundation, Oklahoma City, OK 73104

15  
16 <sup>†</sup>Translational and Functional Genomics Branch, National Human Genome Research  
17 Institute, National Institutes of Health, Bethesda, Maryland 20892

18  
19 <sup>‡</sup>Embryonic Stem Cell and Transgenic Mouse Core, National Human Genome  
20 Research Institute, National Institutes of Health, Bethesda, Maryland 20892

21  
22 <sup>§</sup>Zebrafish Core, Translational and Functional Genomics Branch, National Human  
23 Genome Research Institute, National Institutes of Health, Bethesda, Maryland 20892

24  
25 <sup>\*\*</sup>Genomics Core, National Human Genome Research Institute, National Institutes of  
26 Health, Bethesda, Maryland 20892

27  
28 <sup>††</sup>DEWC and GKV contributed equally to this work.

29  
30 <sup>††</sup>Corresponding Authors: WJP and SMB

1 **Running Title:** Cpf1-mediated gene targeting

2

3 **Keywords:** Cpf1 nuclease, genome editing, CRISPR, mouse

4

5 **##Corresponding Authors:**

6 Shawn M. Burgess

7 NHGRI, NIH

8 Bldg 50, Room 5537

9 50 South Drive

10 Bethesda, MD 20814-8004

11 [burgess@mail.nih.gov](mailto:burgess@mail.nih.gov)

12 301-594-8224

13

14 William J. Pavan

15 NHGRI, NIH

16 Bldg 49, Room 4A82

17 49 Convent Drive

18 Bethesda, MD 20814-4472

19 [bpavan@mail.nih.gov](mailto:bpavan@mail.nih.gov)

20 301-496-7584

## ABSTRACT

Cpf1 has emerged as an alternative to the Cas9 RNA-guided nuclease. Here we show that gene targeting rates in mice using Cpf1 can meet or even surpass Cas9 targeting rates (approaching 100% targeting) but require higher concentrations of mRNA and guide. We also demonstrate that co-injecting two guides with close targeting sites can result in synergistic genomic cutting, even if one of the guides has minimal cutting activity.

## INTRODUCTION

The CRISPR/Cas9 systems has revolutionized genome editing in many model and non-model organisms. Because of its high efficiency and simplicity of target design, CRISPR/Cas9 is now being used for a wide variety of molecular biology applications (Sander and Joung 2014). The technique was simplified with the use of single guide RNAs (sgRNA) containing a target site and chimeric crRNA and tracrRNA sequences that can direct Cas9 to the target site (Hsu *et al.* 2014). Target recognition only requires the presence of a protospacer adjacent motif (PAM) at the 3' end of the target site. The widely used Cas9 protein from *Streptococcus pyogenes* (SpCas9) utilizes a G-rich, NGG PAM sequence that limits the selection of target sites, however, Cas9 orthologs and engineered Cas9 variants that recognize other PAM sequences have expanded the set of available target sites. Still more target sites are available with the recently identified CRISPR/Cpf1 class of proteins (Zetsche *et al.* 2015). Similar to Cas9 proteins, Cpf1 proteins are single RNA-guided endonucleases, but they function without tracrRNA and recognize a T-rich PAM. While an entire family of Cpf1 proteins was discovered, only two Cpf1 proteins, from *Acidaminococcus* (AsCpf1) and *Lachnospiraceae* (LbCpf1), have been shown to work for mammalian genome editing *in vitro*. Both AsCpf1 and LbCpf1 recognize a TTTN PAM site that could be useful in targeting regulatory regions or AT-rich genomes. Two groups have recently reported Cpf1 activity in mice, although with variable targeting rates and 3 different methods to

1 deliver the Cpf1 into mouse zygotes including pronuclear microinjection of ribonuclear-  
2 protein complexes (RNPs), electroporation of RNPs, or cytoplasmic microinjection of  
3 mRNA/gRNA mixtures (Hur *et al.* 2016; Kim *et al.* 2016). Here, we report the first  
4 demonstration of AsCpf1 activity using a distinct delivery method, pronuclear  
5 microinjection of RNA, show the targeting rate with this delivery method is highly  
6 dependent on RNA concentration, and that multiple tested target sequences and  
7 conditions were ineffective for targeting in zebrafish embryos.

8  
9

## 10 RESULTS AND DISCUSSION

11  
12 To test if AsCpf1 had activity following pronuclear injection and if the targeting  
13 rate of AsCpf1 for *in vivo* gene knockout in mouse is affected by RNA concentration,  
14 Exon 1 of *Tyrosinase* (*Tyr*) was targeted with two different gRNAs (Figure 1A). The  
15 gRNAs were injected individually, or co-injected as a pair along with AsCpf1 RNA for  
16 pronuclear injection at either a “low” concentration (10ng/μl Cpf1 with 2.5ng each  
17 gRNA,) comparable to concentrations routinely used for Cas9 targeting, or a “high”  
18 concentration (50ng/μl with 100ng each gRNA). In total, 297 founders were screened  
19 following 13 injection sessions carried out in parallel to compare the targeting rate  
20 following injection of low or high concentrations of gRNA and Cpf1 RNA (Supplemental  
21 Table 1). Among the founder mice that were carried to term to allow for phenotype  
22 screening after birth, albino mice as well as mosaic mice with visible patches of albino  
23 hair were observed, phenotypes consistent with efficient targeting of the wild-type  
24 C57BL/6J *Tyr* allele in the hybrid C57BL/6J x FVB/N F1 mice (Figure 1B). The 297  
25 founder mice were initially genotyped by sizing a fluorescently labeled PCR product  
26 spanning the two target sites to detect potential indels at any sites of DNA cleavage  
27 using both low resolution agarose gels and high resolution capillary electrophoresis  
28 (Supplemental Figure 1). In total, PCR products that differed from the expected 351bp  
29 wild-type product were detected in 73/297 founder mice, indicating that indels occurred  
30 with an overall frequency of 24.6%. Importantly, injection sessions with a high RNA  
31 concentration resulted in a much higher targeting rate (73.3% of the founders)

1 compared to those with a low RNA concentration (3.4% of the founders) (Supplemental  
2 Table 1). Because of the overall high efficiencies of targeting with two guides at the high  
3 RNA concentration and small number of founders, we could not make conclusions  
4 about any effect the direction of the cross had on the targeting rate ((C57BL/6J female x  
5 FVB/N male) vs (FVB/N female x C57BL/6J male)) (Supplemental Table 2). However, in  
6 the low concentration injections, we observed a significantly higher targeting rate with  
7 C57BL/6J fertilized eggs (C57BL/6J female x FVB/N male) compared to the reciprocal  
8 cross (Supplemental Table 2). Importantly, the high concentration injections were more  
9 efficient independent of the direction of the cross (Supplemental Table 3).

10 To further characterize the AsCpf1-mediated indels, a combination of deep  
11 sequencing (Illumina MiSeq) and Sanger sequencing was carried out on PCR products  
12 spanning the target sites. This sequencing revealed that there was only one Target B  
13 site mutation; all other mutations were localized to the gRNA Target A site.  
14 Furthermore, in the more efficient high concentration injections, a higher targeting rate  
15 per 100 founders was observed at the Target A site when Target B was co-injected with  
16 87.1% (54/62) of founders targeted following co-injection vs 42.8% (12/28) following  
17 single gRNA injected (Fisher's test  $P < 0.0001$ ). While confirmation is needed from  
18 additional experiments, this intriguing result suggests that co-injection of multiple  
19 gRNAs may increase AsCpf1 activity.

20 In the low concentration injections, the majority of mice were wild-type (97%),  
21 and very few heterozygote or mosaic mice were generated that carried one (2%) or two  
22 (1%) mutant alleles. In contrast, the high concentration injections had both a higher rate  
23 of mutation and also a higher rate of mosaicism, with 5% of the founder mice each  
24 carrying as many as 5 different mutant alleles (Figure 1C). In total, 74 different alleles  
25 were identified in the 52 mutant founder mice that were fully characterized by deep  
26 sequencing. The majority of these alleles (71%) arose only in a single founder,  
27 however some alleles (29%) were reoccurring, as 9 alleles arose independently in 4 or  
28 more founder mice (Figure 1D). As expected, approximately 2/3 of the alleles  
29 introduced a frameshift (Figure 1E). The indels ranged in size from -60bp to +15bp and  
30 were mostly deletion alleles (Figure 1F and Supplemental Figure 2), consistent with  
31 observations in *Drosophila melanogaster* (Port and Bullock 2016). All of the founder

1 mice were confirmed to be heterozygous for a SNP (rs31191169) known to be  
2 polymorphic between C57BL/6J and FVB/N that is located 195bp proximal to the Target  
3 A site, indicating that no large deletions occurred that extended beyond the PCR  
4 amplicon used for sequencing.

5 The majority of the founder mice appeared mosaic, as indicated by an uneven  
6 ratio of alleles within the PCR product where one or more mutant alleles were detected  
7 at less than the expected 50%. This result is consistent with the mosaic coat color  
8 pattern observed in founder mice carried to term and indicates that DNA cleavage often  
9 occurred after the one cell stage. Because of this high frequency of mosaic founders,  
10 germline transmission of the AsCpf1-induced mutant alleles was confirmed by breeding  
11 6 founder mice to FVB/N. One of these founders was albino and 5 were mosaic with a  
12 range of 10-70% estimated albino coat color contribution, representing a wide range of  
13 the observed mosaicism including the lowest and highest contribution founders  
14 (Supplemental Figure 3). In all 6 mice, the Cpf1-mediated mutant allele was transmitted  
15 and in one mosaic mouse, two different mutant alleles were transmitted.

16 In contrast to mouse, we were unable to successfully induce gene knockout in  
17 zebrafish with AsCpf1. Using injection methods previously successful with Cas9  
18 (Varshney *et al.* 2015), we targeted 6 genes with 40 different targets (23nt or 24nt), but  
19 no activity was detected by CRISPR-STAT (Carrington *et al.* 2015). These results  
20 suggest that either AsCpf1 has lower activity in zebrafish than Cas9 or that there are  
21 unique technical requirements for AsCpf1 activity in this species.

22 In summary, we detected AsCpf1 activity in mouse, but not in zebrafish. The  
23 level of AsCpf1 activity in mouse zygotes was highly dependent on RNA concentration  
24 and at high concentrations was extremely effective, confirming that AsCpf1 provides an  
25 excellent alternative to Cas9 for the generation of knockout mice. Our targeting rate  
26 with AsCpf1 at high RNA concentrations (42-100% of founders) is significantly higher  
27 than at low RNA concentrations (0-21%) and is consistent with other studies that used a  
28 variety of delivery methods for Cpf1-mediated targeting in mice. For comparison,  
29 successful AsCpf1 targeting was observed following pronuclear microinjection of RNPs  
30 (17-83%) (Hur *et al.* 2016), electroporation of RNPs (14-64%) (Hur *et al.* 2016), and  
31 cytoplasmic microinjection of RNA (18-79%) (Kim *et al.* 2016) (Supplemental Table 4).

1 Our “high” concentration is comparable to that published for cytoplasmic microinjection  
2 of RNA (Kim *et al.* 2016), however much higher than required for Cas9 activity with  
3 pronuclear microinjections which typically are performed using lower RNA  
4 concentrations than cytoplasmic microinjections (Singh *et al.* 2015). Because of the  
5 different delivery methods and limited number of guides tested, few conclusions can be  
6 drawn about the most important variables affecting the AsCpf1 targeting rate in mice,  
7 which may include RNA concentration, mouse strain, delivery method, or local target  
8 sequence. Importantly, our study provides the first direct comparison of a guide RNA at  
9 different concentrations and suggests that Cpf1 is ineffective for targeting at an RNA  
10 concentration that is effective for Cas9 in our laboratory and others (Mashiko *et al.*  
11 2013, Yang *et al.* 2013, Horii *et al.* 2014). Interestingly, we observed that targeting was  
12 more efficient with co-injection of two adjacent guides, even though one guide was  
13 essentially inactive. While this represents data from only a single locus, the statistically  
14 significance ( $P < 0.0001$ ) indicates that the effect of co-injection on targeting rate is worth  
15 testing more broadly in the future.

16 Because the T-rich PAM sequences recognized by AsCpf1 differ from Cas9, the  
17 combination of these nucleases will permit the precise targeting necessary for knock-in  
18 projects, especially those aimed at modeling short sequence variants at particular  
19 genomic locations. Also, the shorter size of the gRNA utilized by AsCpf1 provides an  
20 advantage over Cas9 for reducing the cost of RNA oligonucleotide synthesis and has  
21 the potential to improve efficiency of gRNA delivery. Importantly, the frequency of  
22 homology-directed repair or ligation-mediated insertion by Cpf1 remains to be  
23 determined and could yet provide the largest advantage for Cpf1 over Cas9.

24

25

26

## METHODS

27

28 **Preparation of AsCpf1 RNA and gRNA:** AsCpf1 targets were identified with Benchling  
29 software and selected based only on the presence of a predicted PAM site without  
30 considerations of predicted efficiency. gRNAs were synthesized as custom RNA  
31 oligonucleotides with standard desalting (Integrated DNA Technologies), and

1 resuspended in Picopure system purified water (Hydro Systems) at 500 or 1,000ng/μl.  
2 Two different gRNAs were synthesized for mouse pronuclear injections (unique target  
3 sequence for each is indicated in bold): Target A (5'  
4 TAATTTCTACTCTTGTAGAT**ATGATATCAACATCTACGACCTC**) and Target B (5'  
5 TAATTTCTACTCTTGTAGAT**CTTGTTATTGTGGGAACAAGAAA**). The hAsCpf1  
6 plasmid (Addgene 69982) was a gift from Feng Zhang. A PCR product amplified from  
7 the hAsCpf1 plasmid (Cpf1\_Fwd actggcttatcgaattaatacgaactc; Cpf1\_Rev  
8 cccagctgggtcttcc) was used as a template for *in vitro* RNA synthesis using mMessage  
9 mMachine T7 Ultra Transcription Kit (Thermo Fisher/Ambion) according to the  
10 manufacturer's instructions. RNA was recovered using the MEGAclear Transcription  
11 Clean-up Kit (Thermo Fisher/Ambion). RNA quality was assessed with a Bioanalyzer  
12 instrument (Agilent Genomics) and stored in aliquots at -80°C until used for injections  
13

14 **Pronuclear Injection:** Pronuclear injection was performed with standard  
15 procedures (Behringer *et al.* 2014). Briefly, fertilized eggs were collected from  
16 superovulated FVB/N (Taconic Farms; abbreviated FVB) or C57BL/6J (Jackson  
17 Laboratories; abbreviated B6) females approximately 9 hours after mating with  
18 C57BL/6J or FVB/N males, respectively. Microinjections were performed using a  
19 capillary needle with a 1-2μm opening pulled with a Sutter P-1000 micropipette puller.  
20 The pronucleus was injected using a FemtoJet 4i (Eppendorf) with continuous flow that  
21 we estimate to result in approximately 2pl of injection mix. Following visualization of  
22 pronuclear swelling, the needle was pulled out through the cytoplasm, likely resulting in  
23 a small amount of additional RNA delivery to the cytoplasm. Injected eggs were  
24 surgically transferred to pseudopregnant CB6F1 hybrid recipient females, bred at the  
25 NIH from a cross of Balb/cJ females to C57Bl/6J males. In general, the injection mix  
26 contained AsCpf1 RNA and gRNA diluted in 10mM Tris, 0.25mM EDTA (pH 7.5).  
27 Specific RNA and DNA concentrations for each injection session are provided  
28 (Supplemental Table 1).

29



1 **Mouse husbandry:** All animal procedures were performed in a pathogen-free,  
2 AAALAC-approved facility in accordance with NIH guidelines and approved by the  
3 NHGRI Animal Care and Use Committee (ACUC).

4  
5 **Genotyping:** Founder animals were screened using a combination of PCR and  
6 sequencing as previously described (Varshney *et al.* 2015). Briefly, DNA was extracted  
7 from midgestation whole embryos or pup tail biopsies and purified using a Genra  
8 Puregene Mouse Tail Kit (Qiagen). A PCR product spanning both gRNA target sites  
9 was generated using a Tyr-specific forward primer with an M13-tail  
10 (tgtaaacgacggccagtTCTATGTCATCCCCACAGGCAC) and a Tyr-specific reverse  
11 primer containing a pig-tail (gtgtcttGGTGACGACCTCCCAAGTACTC). The PCR  
12 product was amplified with the addition of a 6-FAM or HEX labeled M13-forward  
13 oligonucleotide and run on an ABI 3130xl with ROX400 or ROX500 size standards to  
14 detect small indels (<50bp) at single base pair resolution. Standard agarose gels were  
15 also used to screen PCR products for larger indels (>20bp) including possible deletion  
16 of the 116bp between the two guides which was never observed.

17  
18 A subset of founders with PCR product sizes that differed from wild-type were further  
19 characterized by Sanger sequencing of total PCR products or subcloned PCR products  
20 generated with additional gene specific primers. Additionally, selected founders were  
21 characterized with deep sequencing using PCR products generated with Tyr-specific  
22 primers (tgtaaacgacggccagtTTTTCTTACCTCACTTTAGCAAAACA and  
23 GGATGCTGGGCTGAGTAAGT) along with the barcoded third primer set, as described  
24 earlier (Varshney *et al.* 2015). The sequences were analyzed using minor modifications  
25 of the amplicoDIVider pipeline initially developed to identify deletion and insertion  
26 variants (DIVs) in deep sequencing data from zebrafish Cas9 mutants (Varshney *et al.*  
27 2015). The amplicoDIVider scripts are publicly available  
28 (<https://research.nhgri.nih.gov/software/amplicondivider>).

29  
30  
31

## ACKNOWLEDGEMENTS

We thank Feng Zhang and Bernd Zetsche for providing the AsCpf1 plasmid and valuable advice, Arturo Incao for genomic DNA preparation and PCR amplification, Gene Elliott for assistance with microinjections, Laura Baxter for careful reading of the manuscript, and Abdel Elkahlon and Weiwei Wu of the NHGRI Microarray Core for assistance assessing RNA quality. This research was supported by the Intramural Research Program of the National Human Genome Research Institute at the National Institutes of Health (SMB: ZIA HG000183-15 and WJP: HG000136-11)

## REFERENCES

- Behringer, R., M. Gertsenstein, K. V. Nagy, and A. Nagy, 2014 *Manipulating the Mouse Embryo: A Laboratory Manual, Fourth Edition*. Cold Spring Harbor Laboratory Press, New York.
- Carrington, B., G. K. Varshney, S. M. Burgess, and R. Sood, 2015 CRISPR-STAT: an easy and reliable PCR-based method to evaluate target-specific sgRNA activity. *Nucleic Acids Res* 43: e157.
- Horii, T., Y. Arai, M. Yamazaki, S. Morita, M. Kimura *et al.*, 2014 Validation of microinjection methods for generating knockout mice by CRISPR/Cas-mediated genome engineering. *Scientific Reports* 4:4513.
- Hsu, P. D., E. S. Lander, and F. Zhang, 2014 Development and Applications of CRISPR-Cas9 for Genome Engineering. *Cell* 157: 1262–1278.
- Hur, J. K., K. Kim, K. W. Been, G. Baek, S. Ye *et al.*, 2016 Targeted mutagenesis in mice by electroporation of Cpf1 ribonucleoproteins. *Nat Biotech*.
- Kim, Y., S.-A. Cheong, J. G. Lee, S.-W. Lee, M. S. Lee *et al.*, 2016 Generation of knockout mice by Cpf1-mediated gene targeting. *Nat Biotech*.
- Mashiko, D., Y. Fujihara, Y. Satouh, H. Miyata, A. Isotani *et al.*, 2013 Generation of mutant mice by pronuclear injection of circular plasmid expressing Cas9 and single guided RNA. *Scientific Reports* 3:3355.
- Port, F., and S. L. Bullock, 2016 Expansion of the CRISPR toolbox in an animal with

- 1 tRNA-flanked Cas9 and Cpf1 gRNAs. bioRxiv.
- 2 Sander, J. D., and J. K. Joung, 2014 CRISPR-Cas systems for editing, regulating and  
3 targeting genomes. *Nat Biotech* 32: 347–355.
- 4 Singh, P., J.C. Schimenti, E. Bolcun-Filas, 2015 A Mouse Geneticist's Practical Guide to  
5 CRISPR Applications. *Genetics* 199:1-15.
- 6 Varshney, G. K., W. Pei, M. C. LaFave, J. Idol, L. Xu *et al.*, 2015 High-throughput gene  
7 targeting and phenotyping in zebrafish using CRISPR/Cas9. *Genome Res* 25:  
8 1030–1042.
- 9 Yang, H., H. Wang, S.S. Chikdu, A.W. Cheng, L. Shi, *et al.*, 2013 One-Step Generation  
10 of Mice Carrying Reporter and Conditional Alleles by CRISPR/Cas-Mediated  
11 Genome Engineering. *Cell* 154:1370-1379.
- 12 Zetsche, B., J. S. Gootenberg, O. O. Abudayyeh, I. M. Slaymaker, K. S. Makarova *et al.*,  
13 2015 Cpf1 is a single RNA-guided endonuclease of a class 2 CRISPR-Cas system.  
14 *Cell* 759–771.
- 15

1 **Figure 1**

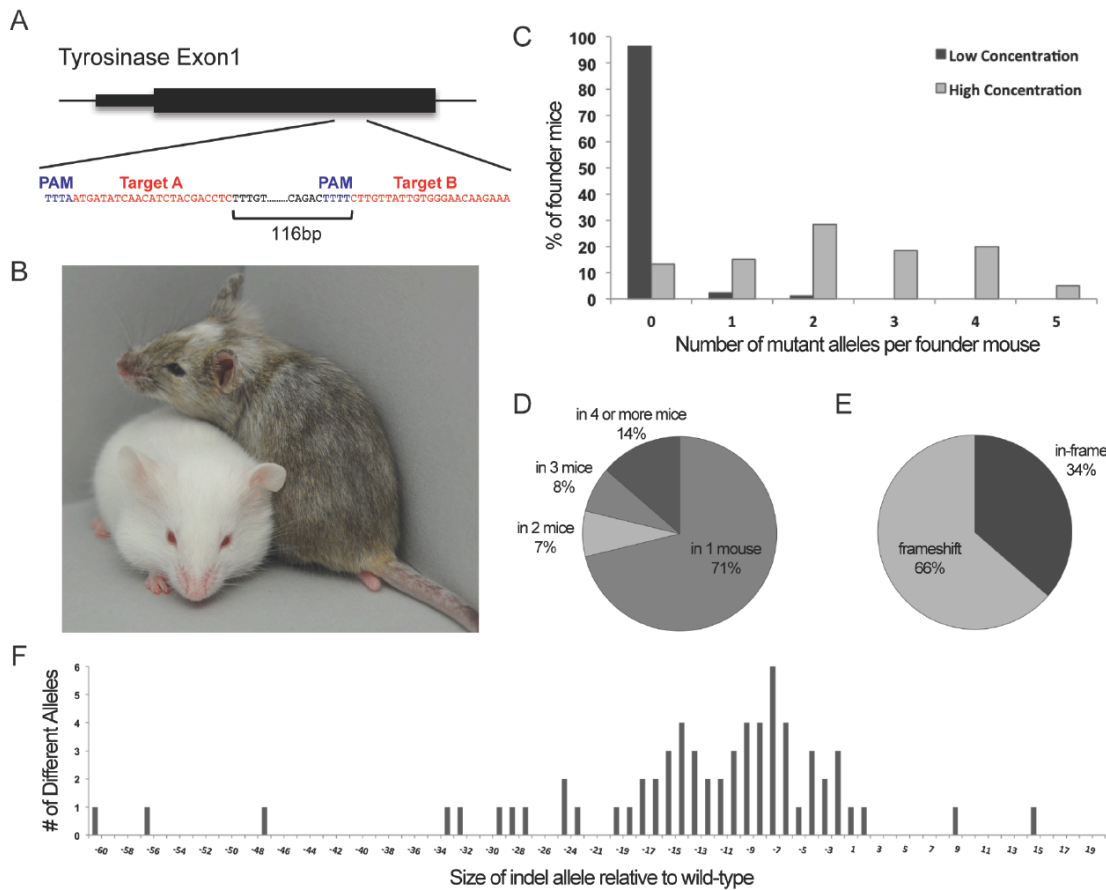

2  
 3 **Figure 1** *In vivo* activity of AsCpf1. (A) Two gRNAs, A and B, were selected within  
 4 *Tyrosinase* (*Tyr*) exon 1. (B) Two founder mice showing examples of a heterozygote  
 5 albino mutant (left) next to a mosaic littermate (right), whose albino patches of fur  
 6 resulted from AsCpf1-mediated mutation of the wild-type C57BL/6J *Tyr* allele within a  
 7 subset of cells during development. (C) The percentage of founder mice carrying 0 to 5  
 8 different mutant *Tyr* alleles is shown for the low and high concentration injection  
 9 sessions. (D) The percentage of mutant *Tyr* alleles that arose in a single founder or  
 10 were recurring in two or more founder mice. (E) The percentage of mutant *Tyr* alleles  
 11 predicted to introduce frameshift vs. in-frame mutations. (F) The net size of indel alleles  
 12 compared to the expected size of the wild-type *Tyr* sequence.

## 1 Supplemental Figure 1

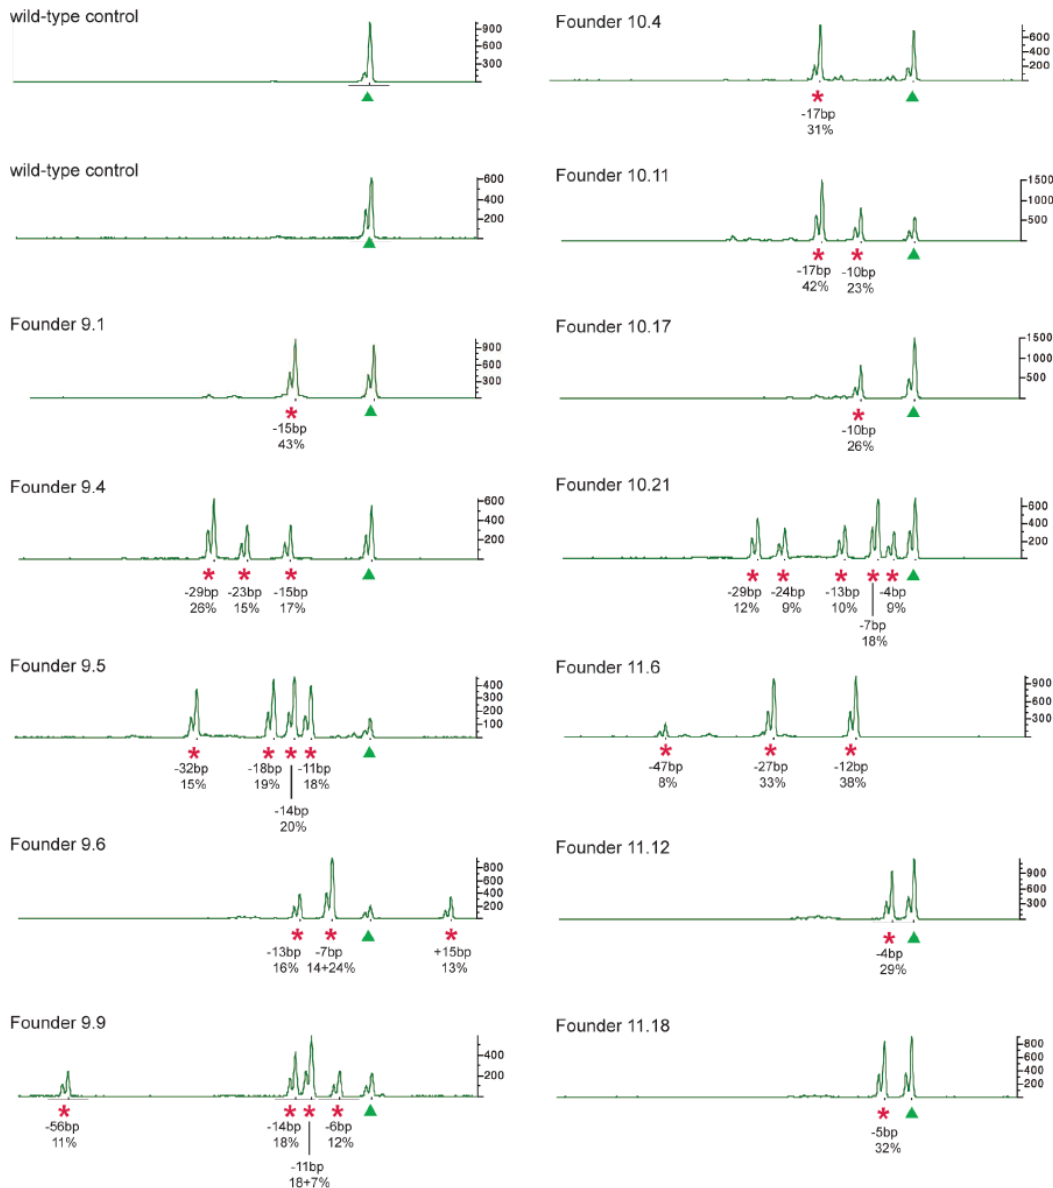

2

3 **Supplemental Figure 1** Examples of 2 wild-type and 12 founder mice screened with a

4 fluorescently labeled PCR product. WT *Tyr* allele products are indicated (green

5 arrowhead) as well as mutant *Tyr* alleles confirmed by deep sequencing of an

6 independent PCR product (red \*). For mutant alleles, the size of each allele relative to

7 wild-type is indicated along with the percentage of sequencing reads. Note that founder

8 11.6 lacks a wild-type allele. Upon sequencing, we determined that the single -7bp

9 peak in founder 9.6 was actually a mix of two different -7bp mutant alleles. Similarly the

10 -11bp peak in founder 9.9 contained two different -11bp mutant alleles.



1 **Supplemental Figure 3**

2

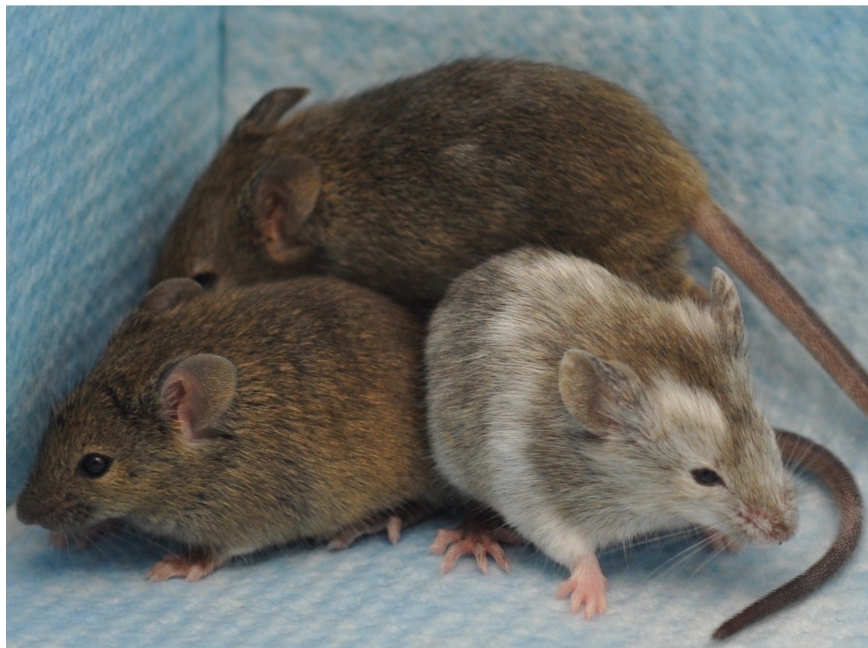

3

4

5 **Supplemental Figure 3** Mosaic transmission of AsCpf1-mediated mutant alleles. 6  
6 founders were bred to confirm transmission of the mutant alleles: 1 albino mouse and 5  
7 mosaics ranging from 10-70% albino coat color contribution. In crosses of all 6 mice to  
8 FVB, germline transmission of the mutant allele occurred. Two of the 6 mice are shown  
9 here: the mouse with the lowest albino coat color contribution (10%) in the center, and  
10 the mouse with the highest coat color contribution (70%) on the right. For comparison, a  
11 wild-type agouti mouse is shown on the left.

12

13

14

**Supplemental Table 1. Summary of injection sessions**

| <b>Cpf1<br/>(ng/μl)</b>                                     | <b>Target A<br/>(ng/μl)</b> | <b>Target B<br/>(ng/μl)</b> | <b>Egg strain<br/>(♀ x ♂)</b> | <b># eggs<br/>implanted</b> | <b># pups or<br/>embryos<br/>recovered</b> | <b>#<br/>founders<br/>targeted</b> | <b>%<br/>founders<br/>targeted</b> |
|-------------------------------------------------------------|-----------------------------|-----------------------------|-------------------------------|-----------------------------|--------------------------------------------|------------------------------------|------------------------------------|
| 10                                                          | 2.5                         | 2.5                         | B6xFVB                        | 128                         | 24                                         | 5/24                               | 20.8%                              |
| 10                                                          | 2.5                         | 2.5                         | B6xFVB                        | 101                         | 30                                         | 1/30                               | 3.3%                               |
| 10                                                          | 2.5                         | 2.5                         | FVBxB6                        | 180                         | 54                                         | 1/54                               | 1.9%                               |
| 10                                                          | 2.5                         | 2.5                         | FVBxB6                        | 110                         | 17                                         | 0/17                               | 0.0%                               |
| 10                                                          | 2.5                         | 2.5                         | FVBxB6                        | 168                         | 36                                         | 0/36                               | 0.0%                               |
| 10                                                          | 2.5                         | -                           | FVBxB6                        | 40                          | 1                                          | 0/1                                | 0.0%                               |
| 10                                                          | 2.5                         | -                           | FVBxB6                        | 144                         | 45                                         | 0/45                               | 0.0%                               |
| 50                                                          | 100                         | 100                         | B6xFVB                        | 50                          | 21                                         | 18/21                              | 85.7%                              |
| 50                                                          | 100                         | 100                         | B6xFVB                        | 48                          | 23                                         | 21/23                              | 91.3%                              |
| 50                                                          | 100                         | 100                         | B6 x B6                       | 62                          | 16                                         | 13/16                              | 81.2%                              |
| 50                                                          | 100                         | 100                         | FVBxB6                        | 80                          | 2                                          | 2/2                                | 100%                               |
| 50                                                          | 100                         | -                           | FVBxB6                        | 72                          | 11                                         | 5/11                               | 45.5%                              |
| 50                                                          | 100                         | -                           | FVBxB6                        | 100                         | 17                                         | 7/17                               | 41.2%                              |
| <b>Average across all 12 injection sessions:</b>            |                             |                             |                               |                             |                                            | <b>73/297</b>                      | <b>24.6%</b>                       |
| <b>Average for 7 low concentration injection sessions:</b>  |                             |                             |                               |                             |                                            | <b>7/207</b>                       | <b>3.4%</b>                        |
| <b>Average for 6 high concentration injection sessions:</b> |                             |                             |                               |                             |                                            | <b>66/90</b>                       | <b>73.3%</b>                       |

1

2



1

**Supplemental Table 2. Effect of strain on targeting rate for each injection concentration\***

|                                         | <b>B6 ♀ x FVB ♂</b> | <b>FVB ♀ x B6 ♂</b> | <b>Comparison (Fisher's)</b> |
|-----------------------------------------|---------------------|---------------------|------------------------------|
| <b>Total for all injection sessions</b> | 45/98 (45.9%)       | 15/183 (8.2%)       | <b>P &lt; 0.0001</b>         |
| <b>High concentration with 2 guides</b> | 39/44 (88.6%)       | 2/2 (100%)          | <b>P = 1.0000</b>            |
| <b>High concentration with 1 guide</b>  | -                   | 12/28 (42.9%)       | -                            |
| <b>Low concentration with 2 guides</b>  | 6/54 (11.1%)        | 1/107 (0.9%)        | <b>P = 0.0060</b>            |
| <b>Low concentration with 1 guide</b>   | -                   | 0/46 (0%)           | -                            |

2

3 **\*Data in this table is tallied from Supplemental Table 1**

4

5

6

7

**Supplemental Table 3. Effect of concentration on targeting rate for each strain\***

|                                     | <b>High Concentration</b> | <b>Low Concentration</b> | <b>Comparison (Fisher's)</b> |
|-------------------------------------|---------------------------|--------------------------|------------------------------|
| <b>B6 ♀ x FVB ♂, all injections</b> | 39/44 (88.6%)             | 6/54 (11.1%)             | <b>P &lt; 0.0001</b>         |
| <b>B6 ♀ x FVB ♂ with 2 guides</b>   | 39/44 (88.6%)             | 6/54 (11.1%)             | <b>P &lt; 0.0001</b>         |
| <b>B6 ♀ x FVB ♂ with 1 guide</b>    | -                         | -                        | -                            |
| <b>FVB ♀ x B6 ♂, all injections</b> | 14/30 (46.7%)             | 1/153 (0.7%)             | <b>P &lt; 0.0001</b>         |
| <b>FVB ♀ x B6 ♂ with 2 guides</b>   | 2/2 (100%)                | 1/107 (0.9%)             | <b>P = 0.0005</b>            |
| <b>FVB ♀ x B6 ♂ with 1 guide</b>    | 12/28 (42.9%)             | 0/46 (0%)                | <b>P &lt; 0.0001</b>         |

**\*Data in this table is tallied from Supplemental Table 1**

8

## Supplemental Table 4: Comparison of successful targeting with AsCpf1

| Reference                  | Delivery                          | Cpf1              | Guide RNA  | Gene                   | # of founders targeted   | % of founders targeted |
|----------------------------|-----------------------------------|-------------------|------------|------------------------|--------------------------|------------------------|
| Hur et al. 2016            | Pronuclear microinjection of RNPs | 200 ng/μl protein | 9000 ng/μl | Foxn1                  | 10/12 blasts             | 83.0                   |
| Hur et al. 2016            | Pronuclear microinjection of RNPs | 200 ng/μl protein | 9000 ng/μl | Foxn1                  | 1/6 offspring            | 17.0                   |
| Hur et al. 2016            | Electroporation of RNPs           | 100 ng/μl protein | 250 ng/μl  | Foxn1                  | 16/25 blasts             | 64.0                   |
| Hur et al. 2016            | Electroporation of RNPs           | 100 ng/μl protein | 250 ng/μl  | Foxn1                  | 3/7 offspring            | 43.0                   |
| Hur et al. 2016            | Electroporation of RNPs           | 100 ng/μl protein | 250 ng/μl  | Tyr                    | 4/12 blasts              | 33.0                   |
| Hur et al. 2016            | Electroporation of RNPs           | 100 ng/μl protein | 250 ng/μl  | Tyr                    | 1/7 offspring            | 14.0                   |
| Kim et al. 2016            | Cytoplasmic microinjection of RNA | 50 ng/μl mRNA     | 100 ng/μl  | p53 guide #1           | 12/16 embryos            | 75.0                   |
| Kim et al. 2016            | Cytoplasmic microinjection of RNA | 50 ng/μl mRNA     | 100 ng/μl  | p53 guide #2           | 3/7 embryos              | 42.9                   |
| Kim et al. 2016            | Cytoplasmic microinjection of RNA | 50 ng/μl mRNA     | 100 ng/μl  | p53 guide #1&2         | 19/24 newborns           | 79.2                   |
| Kim et al. 2016            | Cytoplasmic microinjection of RNA | 50 ng/μl mRNA     | 100 ng/μl  | Prkdc guide #1& 2      | 2/11 newborns            | 18.2                   |
| Kim et al. 2016            | Cytoplasmic microinjection of RNA | 50 ng/μl mRNA     | 50 ng/μl   | p53 & Prkdc (4 guides) | 25/35 embryos            | 71.4                   |
| Watkins-Chow et al: "Low"  | Pronuclear Injection of RNA       | 10 ng/μl mRNA     | 2.5 ng/μl  | Tyr guide A & B        | 7/207 offspring& embryos | 3.4*                   |
| Watkins-Chow et al: "High" | Pronuclear Injection of RNA       | 50 ng/μl mRNA     | 100 ng/μl  | Tyr guide A & B        | 66/90 embryos            | 73.3*                  |

\*Results from the current publication are provided as an average of multiple injection sessions. See Supplemental Table 1 for details of individual injections. Results for Hur et al. 2016 and Kim et al. 2016 are presented as individual experiments as provided in publication for comparison.
